# Supplementary material for: The Effect of Food Intake on the Pharmacokinetics of Oral Basal Insulin: A Randomised Crossover Trial in Healthy Male Subjects
Source: Springer Nature journal article supplement (doi:10.1007/s40262-019-00772-2), 2019-05-16
Supplement: MOESM1 [file 16729070]

## **Electronic supplementary material**

### **Clinical Pharmacokinetics**

#### **The Effect of Food Intake on the Pharmacokinetics of Oral Basal Insulin: A Randomised Crossover Trial in Healthy Male Subjects**

Inge B. Halberg<sup>1</sup>, Karsten Lyby<sup>1</sup>, Karsten Wassermann<sup>1</sup>, Tim Heise<sup>2</sup>, Leona Plum-Mörschel<sup>3</sup>, Eric Zijlstra<sup>2</sup>

<sup>1</sup>Novo Nordisk A/S, Vandtårnsvej 114, 2860 Søborg, Denmark

<sup>2</sup>Profil Institut für Stoffwechselforschung GmbH, Hellersbergstraße 9, 41460 Neuss, Germany

<sup>3</sup>Profil Mainz GmbH & Co. KG, Rheinstraße 4c, 55116 Mainz, Germany

#### **Corresponding author:**

Inge B. Halberg

E-mail: [ibh@novonordisk.com](mailto:ibh@novonordisk.com)

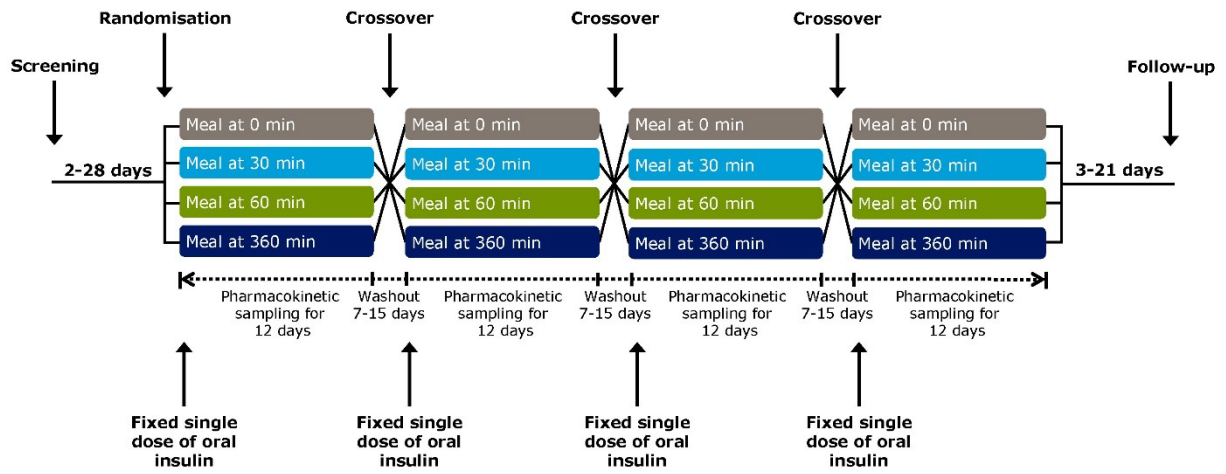

**Fig. S1** Trial design.

**Table S1** Pharmacokinetic blood sampling scheme

| Nominal time<br>(hh:mm) | Insulin 338 | Capric acid |
|-------------------------|-------------|-------------|
| 00:00 <sup>a</sup>      | X           | X           |
| 00:05                   | X           | X           |
| 00:10                   | X           | X           |
| 00:15                   | X           | X           |
| 00:20                   | X           | X           |
| 00:25                   | X           | X           |
| 00:30                   | X           | X           |
| 00:40                   | X           | X           |
| 00:50                   | X           | X           |
| 01:00                   | X           | X           |
| 01:15                   | X           | X           |
| 01:30                   | X           | X           |
| 01:45                   | X           | X           |
| 02:00                   | X           | X           |
| 02:15                   | X           | X           |
| 02:30                   | X           | X           |
| 02:45                   | X           | X           |
| 03:00                   | X           | X           |
| 03:30                   | X           | X           |
| 04:00                   | X           | X           |
| 05:00                   | X           |             |
| 06:00                   | X           | X           |
| 08:00                   | X           | X           |
| 10:00                   | X           |             |
| 12:00                   | X           | X           |
| 14:00                   | X           |             |
| 16:00                   | X           |             |
| 18:00                   | X           |             |
| 20:00                   | X           |             |
| 22:00                   | X           |             |
| 24:00                   | X           | X           |
| 27:00                   | X           |             |
| 30:00                   | X           |             |
| 36:00                   | X           |             |
| 48:00                   | X           |             |
| 72:00                   | X           |             |
| 96:00                   | X           |             |
| 120:00                  | X           |             |
| 168:00                  | X           |             |
| 216:00                  | X           |             |
| 288:00                  | X           |             |

<sup>a</sup>Within 15 min pre-dose.

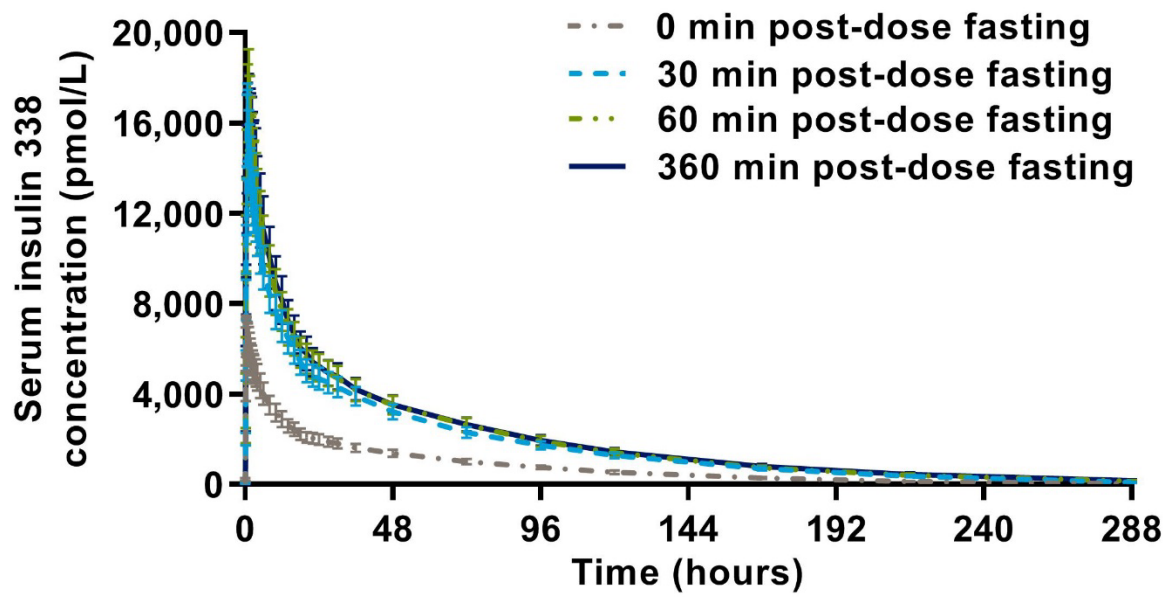

**Fig. S2** Mean serum insulin 338 concentration-time profiles after oral administration and varying duration of post-dose fasting in healthy males. Error bars show standard error of the mean.

**Table S2** Total variability in  $AUC_{Ins338,0-\infty}$  and  $C_{max,Ins338}$  after an oral single dose of insulin 338 and varying duration of post-dose fasting in healthy male subjects

|                         | Post-dose fasting period |        |        |         | p value |
|-------------------------|--------------------------|--------|--------|---------|---------|
|                         | 0 min                    | 30 min | 60 min | 360 min |         |
| $AUC_{Ins338,0-\infty}$ |                          |        |        |         |         |
| Total variability (CV%) | 106.1                    | 131.5  | 91.4   | 82.4    | 0.11    |
| $C_{max,Ins338}$        |                          |        |        |         |         |
| Total variability (CV%) | 122.2                    | 163.2  | 90.0   | 84.5    | <0.01   |

Total variability consists of both the within-subject day-to-day variability and the between-subject variability.

Data are estimated CV%. The p value is from a likelihood ratio test, investigating if the model with different variances for the 4 post-dose fasting periods could be reduced to a model with a common variance for all 4 post-dose fasting periods.

$AUC_{Ins338,0-\infty}$ , area under the concentration-time curve for insulin 338 from time zero to infinity;  $C_{max,Ins338}$ , maximum concentration of insulin 338; CV%, percentage coefficient of variation.

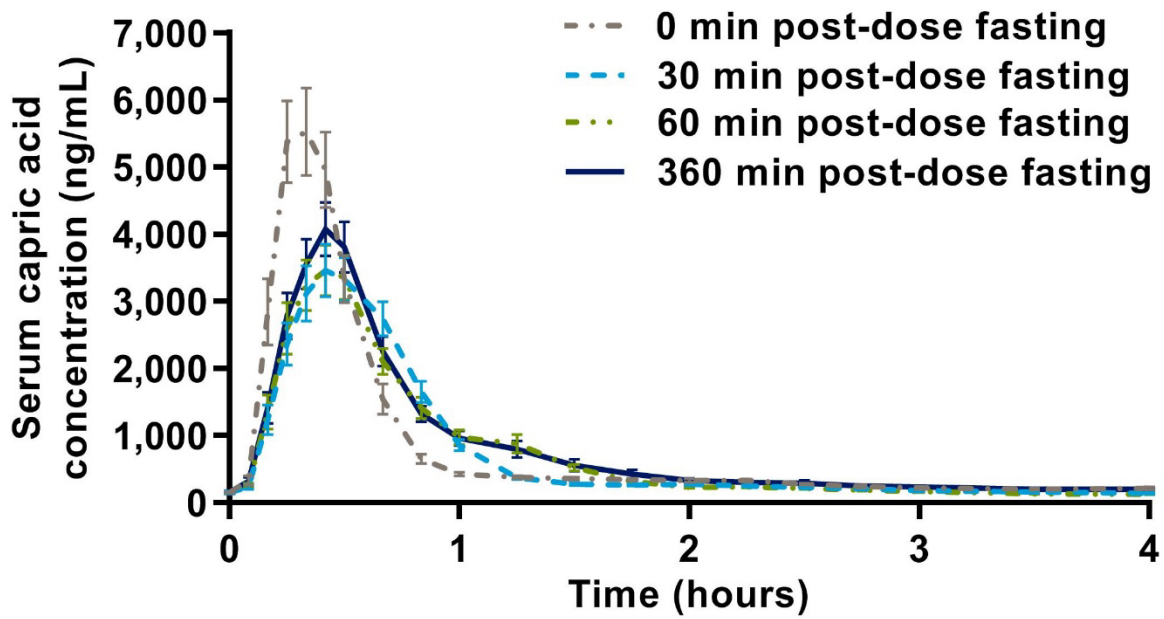

**Fig. S3** Mean serum capric acid concentration-time profiles after oral administration of insulin 338 and varying duration of post-dose fasting in healthy males. Error bars show standard error of the mean.

**Table S3** Summary of  $AUC_{\text{Capric acid},0-6h}$ ,  $C_{\text{max, Capric acid}}$  and  $t_{\text{max, Capric acid}}$  after an oral single dose of insulin 338 and varying duration of post-dose fasting in healthy male subjects

|                                                                        | Post-dose fasting period |             |             |             |
|------------------------------------------------------------------------|--------------------------|-------------|-------------|-------------|
|                                                                        | 0 min                    | 30 min      | 60 min      | 360 min     |
| <b><math>AUC_{\text{Capric acid},0-360\text{min}}</math> (ng·h/mL)</b> |                          |             |             |             |
| Geometric mean                                                         | 3,500                    | 3,034       | 3,070       | 3,552       |
| CV%                                                                    | 31.6                     | 26.0        | 28.4        | 28.4        |
| Median                                                                 | 3,442                    | 2,979       | 3,061       | 3,563       |
| Min-Max                                                                | 1,579-6,803              | 1,494-5,281 | 1,594-5,265 | 1,933-6,074 |
| <b><math>C_{\text{max, Capric acid}}</math> (ng/mL)</b>                |                          |             |             |             |
| Geometric mean                                                         | 5,079                    | 4,304       | 4,094       | 4,730       |
| CV%                                                                    | 64.2                     | 46.9        | 49.7        | 43.1        |
| Median                                                                 | 7050                     | 4890        | 4630        | 5590        |
| Min-Max                                                                | 440-18,000               | 616-10,400  | 836-10,100  | 1,350-9,730 |
| <b><math>t_{\text{max, Capric acid}}</math> (min)</b>                  |                          |             |             |             |
| Geometric mean                                                         | 23.0                     | 28.9        | 30.5        | 28.9        |
| CV%                                                                    | 137.6                    | 35.6        | 54.5        | 76.4        |
| Median                                                                 | 20                       | 30          | 30          | 25          |
| Min-Max                                                                | 10-240                   | 10-50       | 10-75       | 10-135      |

$AUC_{\text{Capric acid},0-360\text{min}}$ , area under the concentration-time curve for capric acid from time zero to 360 min;  $C_{\text{max, Capric acid}}$ , maximum concentration of capric acid; CV%, percentage coefficient of variation; Max, maximum; Min, minimum;  $t_{\text{max, Capric acid}}$ , time to maximum concentration for capric acid.
